# Supplementary material
Source: Springer Nature journal article supplement (https://www.springermedizin.de/resource/supplementary/13058_2011_3003_MOESM3_ESM.pdf/9703012)

A.

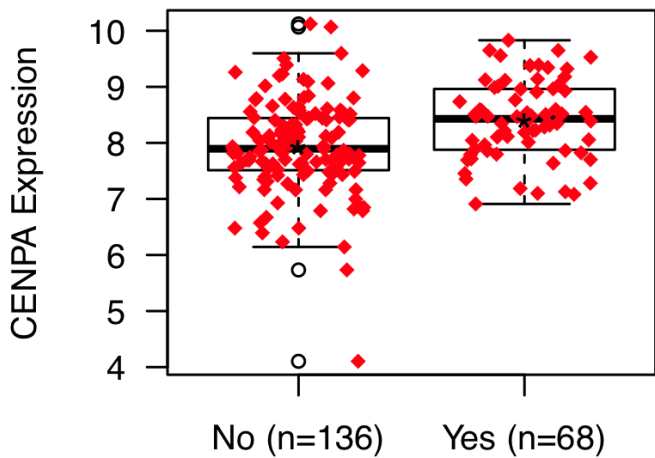

B.

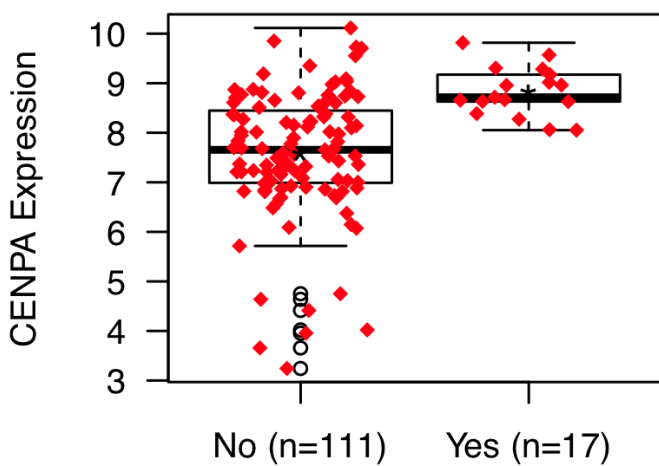

C.

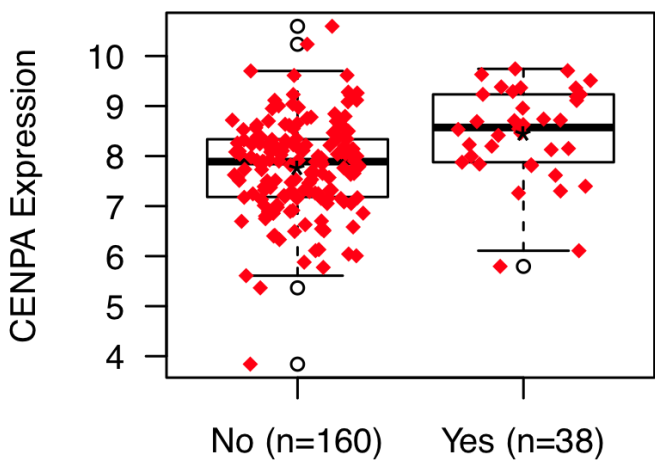

Supplement: MOESM3 [file 9703012]
